# Supplementary material for: A random forest derived 35-year snow phenology record reveals climate trends in the Yukon River Basin
Source: Copernicus journal article supplement (doi:10.5194/egusphere-2024-3608), 2025-01-16
Supplement: Supplementary file [file egusphere-2024-3608-AC2-supplement.pdf]

Response to Reviewer 2:

We thank Dr. Dunmire for taking the time to read our manuscript and provide a constructive and thorough review. We did our best to address each comment and believe the revised manuscript will be greatly improved. Our responses to each comment were highlighted in pink.

## Major Comments

My major concern with this work is that it seems that the RF approach isn't really necessary. In fact, for snowmelt onset, the previous thresholding approach appears to do better (MAE of 11 days compared with 11.6 days for RF), and the IMS dataset does better for snowoff timing (MAE of 15.87 days compared to 16.03 days for random forest). Why can a combination of the thresholding approach for snowmelt onset, and IMS for snowoff not be used then?

Thank you for this important question. While it is true that the MAE for snowmelt onset in the Pan et al. (2020) threshold-based approach was slightly lower (11.0 vs. 11.6 days), the RF model offers several advantages not reflected in these summary metrics:

1. The thresholding approach tends to misclassify temporary warming events as snowmelt onset, particularly in early spring. The RF model better distinguishes transient melt events from true snowmelt onset by incorporating time-series context and multiple predictors (e.g., TDD, snow cover, DOY). As summarized in our manuscript (Conclusion section), "One significant advantage of the RF approach over traditional thresholding methods is its reduced sensitivity to transient melt events and atmospheric fluctuations, making it more reliable in identifying primary snowmelt onset rather than temporary thaw and early melt events caused by brief warming episodes".
2. The RF model performs better in regions with complex terrain, high fractional water, or inconsistent snowpack dynamics, where the thresholding approach tends to be oversimplified under the complex conditions. This is evident in the QAQC maps and error spatial distributions we present.
3. The RF framework is more flexible and capable of integrating additional data sources and predictors (e.g., SAR), enabling continuous model evolution and refinement.
4. The RF or alternative machine learning methods can be adapted to other regions including other large northern hemisphere basins, while the performance of thresholding methods may vary with locations.
5. As shown in our bootstrapping uncertainty analysis, the RF model achieved mean absolute errors of 5.8 days for snowmelt onset and 5.0 days for snowoff when the testing data closely matched the distribution of the training features. This suggests that, under well-matched conditions, the RF model can achieve substantially lower errors than the average MAE values reported across the full domain.

Further, in the conclusion, it is stated that this study delivers "new insights into the timing and variability of snow melt onset and snowoff," but I actually fail to see these new insights. A lot of this phenology was already presented in Pan et al. 2021 (i.e., section 3.2). Is there actually any

new insights that are gained from the RF approach, that are absent when using the thresholding method?

We appreciate the opportunity to clarify this point. While this study was built on Pan et al. (2020), it represents a more comprehensive assessment of snow phenology and driving factors over an extended period as detailed below:

This study extends the snow phenology record to 2023, adding five critical years during which rapid Arctic warming and record-breaking temperatures occurred. The long-term record enables the identification of the accelerated changes in snow phenology in recent years (2006–2023). The findings were summarized in the Conclusion as “Finally, this study produced an extended snow phenology record spanning more than 30-years to better distinguish climate normals and quantify long-term climate trends in the YRB... However, in more recent years (2006–2023), both snowmelt onset and snowoff timing have advanced significantly, coinciding with rising spring and summer temperatures across the YRB. These phenological shifts, along with the lengthening of the snow-free season, align with observed patterns of earlier spring onset and more frequent anomalous warming events in recent years.”

In addition, the RF model predicts daily snow conditions (wet/dry, present/absent), enabling more detailed description and finer analysis of the melt season’s evolution than the thresholding approach (Pan et al., 2020).

We also evaluated model uncertainty over heterogeneous surface conditions (FW, elevation, proximity), and produced spatial error maps, which provided improved quantification of model uncertainty and detailed interpretation of spatial heterogeneity impacts on passive microwave snow retrievals.

The motivation for this work needs to be substantially improved. Given the previous work from 2020, which already presents a 30-year snow phenology record of the YRB with many of the same insights, what does this work add? Why is current knowledge of snow-melt and snowoff conditions in YRB insufficient?

As suggested, we will better clarify the motivation of this work in the Introduction section as follows:

“While threshold-based methods have successfully predicted snow phenology, they often fail to fully capture landscape variability in snow conditions due to their coarse spatial resolution”

“While prior studies, including Pan et al. (2020), provided valuable long-term snow phenology records using threshold-based approaches, these methods are often sensitive to transient melt events, rely on static thresholds, and lack spatially explicit uncertainty estimates. Additionally, previous datasets either span shorter time periods or use lower-resolution inputs, limiting their ability to resolve snowpack dynamics in heterogeneous terrain. To address these limitations, we develop a Random Forest-based approach that integrates dynamic satellite indices and static

landscape features to produce a consistent, high-resolution, and uncertainty-informed snow phenology record from 1988 to 2023”.

For additional clarity Pan et al. 2021 presents a 28-year record (1988-2016). The data record was extended to 2018 after publication.

Second, some details are lacking about the data/methodology. Also, in general, a schematic of the workflow would be incredibly helpful. Please see the below comments, organized by section:

As suggested, we will add a schematic to the Appendix to illustrate the workflow.

### **Section 3.2.1**

L165 – How frequent are missing temporal observations in this data?

Thank you for your comment. Most data gaps were resulted from short-term sensor outages, orbital gaps, or data acquisition issues, which are generally limited to 1–2 consecutive days (e.g., Wang et al., 2016; Long and Brodzik, 2016).

We will update our paragraph to the following, update in bold:

#### **3.2.1 Passive Microwave Satellite Record**

We acquired K-band (19 GHz) and Ka-band (37 GHz) afternoon Tb retrievals at vertical (V) and horizontal (H) polarizations from the MEaSUREs Calibrated Enhanced Resolution Passive Microwave Daily EASE-Grid 2.0 Brightness Temperature ESDR, available from the National Snow and Ice Data Center (NSIDC) (Brodzik and Long, 2016). This Tb record is multidecadal and calibrated across multiple sensors and platforms from different frequencies and polarizations from the NOAA DMSP SSM/I and SSMIS. Each platform has several sensors; from SSM/I we selected F08 (1988–1991), F11 (1992–1995), and F13 (1996–2007), and from SSMIS we used F17 (2007–2016) and F18 (2017–2023). These sensors were selected because their equatorial overpass time remained consistent while in commission. Missing temporal observations were gap-filled using a temporal linear interpolation of adjacent Tb retrievals (Wang et al., 2016). **These missing observations are generally infrequent and short in duration, typically affecting only 1–2 consecutive days due to sensor outages, orbital gaps, or data transmission gaps (Long and Brodzik, 2016; Wang et al., 2016).**

### **Section 3.2.2**

Isn't there also a 1km IMS product that exists? Why was this not used?

Yes, IMS 1km record is available from 2014-2025 (<https://noaadata.apps.nsidc.org/NOAA/G02156/1km/>) . We chose not to use the 1km because of its limited temporal coverage.

I also find details about SnowModel to be lacking here. What is the model forced with?

SnowModel is forced with MERRA-2 and ERA5 as well as NSIDC sea ice parcel concentration and trajectory datasets (Liston et al. 2020). We will add this description to the manuscript text.

Is it consistent with IMS when the two products overlap?

Yes, where data overlap, SnowModel and IMS are consistent and possess similar results. SnowModel and IMS mean and median snowoff values are often within one day. We will add this figure to the Appendix. Reviewer 1 had a similar suggestion as well.

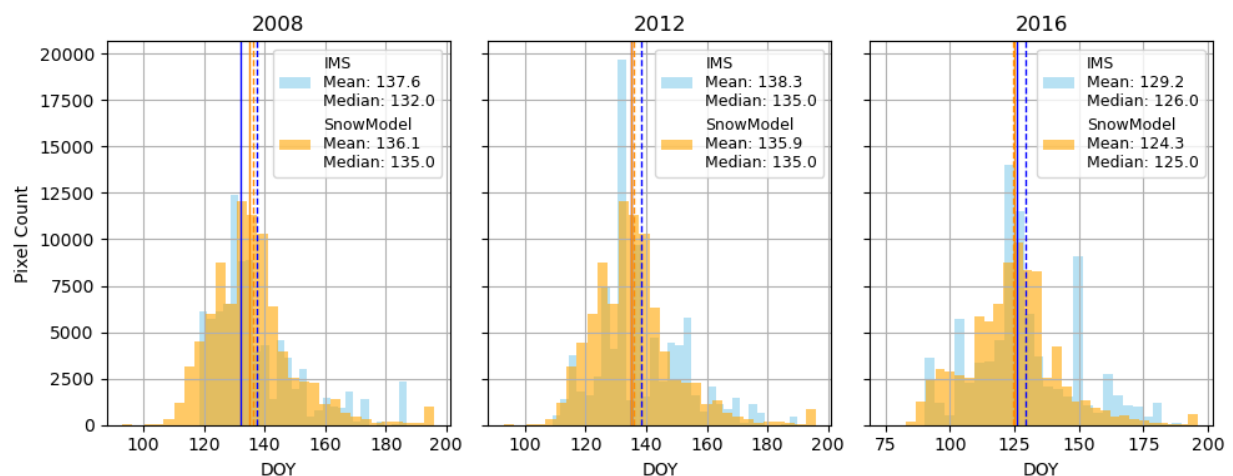

### Section 3.2.3

How was the cumulative thaw degree days calculated? Cumulative from what point in time?

Thank you for this comment. We will include the following in the revised manuscript:

“TDD was created by summing daily mean temperatures above 0°C for each and is returned as a cumulative percent.”

### Section 4.1

Did you try any other ML models such as xgboost or neural networks?

We tested a Long Short Term Memory approach, which did not outperform the RF method. We will discuss the use of alternative machine-learning methods, in particular boosted trees and neural networks in the revised manuscript.

#### Section 4.1.1

How many combinations of parameters did you try in the grid search?

What were the parameters that were changed and what was the range of values tested? Please also reference Table A2 in this section.

We updated TableA2 to include which parameters we tried in the grid search. We will also add the following to the text: ‘A full list of tested parameter ranges and the selected final values for each model are provided in Table A2.’

|                   | Values Tested          | Snowmelt Onset | Snowoff |
|-------------------|------------------------|----------------|---------|
| n_estimators      | 8, 100, 200, 300, 1000 | 100            | 100     |
| min_samples_leaf  | 1, 2, 4                | 4              | 4       |
| max_depth         | None, 10, 20, 30       | 10             | 10      |
| max_features      | auto, sqrt, log        | log2           | log2    |
| min_samples_split | 2, 5, 10               | 5              | 10      |

### Section 4.1.2

More details in this section would be helpful. For example:

How was the split between training and testing done? How was the feature importance computed? Why was the QC metric split into 4 categoric categories, instead of just kept as a number between 0 and 1? Is there information that is lost in doing this?

Thank you for this comment we will update 4.1.2 as follows, additions in bold:

Model performance was assessed using a bootstrapping approach, with an 80/20 split between training and testing data, with replacement, allowing us to evaluate model accuracy and variability. **For each iteration, the training and testing datasets were randomly sampled with replacement from the full dataset, stratified to ensure balanced representation across land cover types.** Performance was evaluated with the training data by (1) extracting the  $R^2$  value to quantify the agreement between observed and predicted dates, and (2) aggregating the Mean Absolute Error (MAE) across different land cover types. To determine whether differences in model error across land cover characteristics were statistically significant, we applied a one-way Analysis of Variance (ANOVA).

**Feature importance was computed using the built-in mean decrease in impurity (MDI) method from the Random Forest algorithm. This approach evaluates the contribution of each feature to the reduction in overall model error across all trees, averaged across iterations. We then calculated the mean and standard deviation of each feature’s importance across all bootstrap runs to assess consistency.**

The output absolute error from our model bootstrapping was used as the dependent variable in an ordinary least squares (OLS) regression, with land cover variables such as FW, TC, elevation, aspect, and proximity serving as explanatory variables (Kim et al., 2011). The goal was to

establish a relationship between the observed error and the land cover characteristics to identify pixels in the YRB where we may expect lower or higher errors. We then applied the OLS model across the YRB to predict anticipated error. These values were scaled from 0 to 1, creating a dimensionless quality control (QC) metric.

**The continuous QC values (0 to 1) were further classified using a natural breaks (Jenks) classification to define four relative quality categories: ‘Best,’ ‘Good,’ ‘Moderate,’ and ‘Low.’** This qualitative classification simplifies interpretation and communication of model quality across the basin, especially in map products or stakeholder-focused outputs. **While this process discretizes a continuous variable, the underlying QC values are retained and available for quantitative analysis.**

#### **Section 4.2.1**

The classification into ‘earlier’ and ‘later’ snow events is not clear. What does ‘snow event’ mean specifically? Why was this done?

Thank you for the helpful comment. We will update section 4.2.1 as follows:

In this context, a “snow event” refers to an annual snow phenology transition—such as snowmelt onset or complete snow disappearance—at the pixel level. Each pixel's event date was compared to its long-term climatological mean (1991–2020). If the event occurred earlier than the mean, it was classified as “earlier”; if later, it was classified as “later.”

This classification enabled us to calculate the total area (in km<sup>2</sup>) of the basin experiencing earlier or later snow events in each year. This spatially aggregated approach provides a more hydrologically meaningful metric than raw day-of-year values, as it reflects how much of the landscape is contributing to earlier or delayed runoff. Framing the results relative to the climatological mean also contextualizes each year’s snowmelt timing within a long-term baseline, helping to interpret the magnitude and direction of interannual variability.

#### **Section 4.2.2**

Please specify what this data was used for.

We will update this section as follows, with additions in bold:

Seasonal air temperature across the YRB was analyzed using data from GHCNd climate stations **to assess long-term climate trends and their relationship to changes in snowpack conditions.** To create a single, harmonized air temperature time series, we selected stations with at least 17 years of data for each of the two time periods (1988–2005 and 2006–2023) from an initial set of 35 stations in the YRB. This selection criterion reduced the set to 8 stations for 1988–2005 and 15 stations for 2006–2023. With the selected stations, we then calculated seasonal average temperature time series for each period, specifically for winter, spring, summer, and combined spring/summer temperatures. **These seasonal means were used in a trend analysis**

to evaluate how air temperatures have changed over time across the YRB and to explore their potential associations with observed snowmelt dynamics.

We also extracted the snow depth at the day of snowmelt onset across YRB using the GHCNd climate stations. Like temperature, we required a station to have recorded at least 17 years of snow depth. We also checked each of these stations to determine if the annual snow depth measurements were complete, because they are often incomplete. These screening criteria resulted in 4 stations selected for 1988–2005 and 13 stations for 2006–2023. **The snow depth data were used to analyze trends in snow**

#### **Minor/Technical Comments:**

L66: “While higher-frequency K-band...” Perhaps this line should go to the next paragraph? It seems a bit out of place in this paragraph which primarily covers C-band SAR and Sentinel-1.

Agreed. Reviewer 1 had a similar response. We will remove this sentence and place it at the end of the previous paragraph.

Figure 1 – Please change the triangle markers to dots.

We will change the triangle markers to dots.

Section 3.1 – This study is for the YRB, but many of the sites used are located outside the YRB, particularly a large number along the southern coast. I understand this is likely done to enhance the limited in-situ data available to train the model, but the impact of this should be mentioned somewhere.

We will add the following the section:

While our focus is on the YRB, we included sites located outside the basin to supplement the sparse in-situ observations within the YRB and enhance model generalizability. This expanded dataset increases the robustness of the model across diverse snowmelt regimes. However, we acknowledge that incorporating data from regions with different climatic conditions (e.g., maritime vs. continental) may introduce some bias, and we interpret model outputs within the YRB with that potential limitation in mind.

L140 – What is meant by ‘analysts’?

We will change ‘analysts’ to ‘we’.

L144 – Why is there a different number of observations available for training snow melt onset and snowoff?

There are certain years for a given station where snow depth measurements end before the last day of snow and so in those circumstances, we cannot assess a snowoff observation. We will clarify this in the revised manuscript.

L149 – Please specify that the snow cover is binary.

We will specify snow cover is binary.

L146–155 – Please mention somewhere in these paragraphs that these variables will be described in more detail in the following sections.

Good point. We will add this clarification in the revised manuscript.

L153 – “GTOPO” in parenthesis is not needed.

We will remove ‘GTOPO.’

L172–174 – Please change “reduce” to “reduced” in these sections to be consistent with the tense throughout the methods section. Check other areas in the methods as well.

Thank you for this comment. We will change ‘reduce’ to ‘reduced’ and check for incorrect tense.

L176, L178 – The equations are numbered in the text, but not in-line. If possible, please include a number next to the equations for easy reference.

We will number equations in-line.

L209 – Can the ‘TC’ abbreviation be changed to ‘FTC’ to be consistent with ‘FW’ (“fractional water”)?

Absolutely, we will change TC to FTC.

L226 – I do not fully understand the sentence: “Although RF does not inherently model temporal sequences like some other algorithms, temporal dimensions were incorporated by structuring each day as a sample within a sequential framework.”

Specifically, the ‘within a sequential framework’ is throwing me off. RFs don’t have a sequential framework, and each sample is treated distinctly, not as part of a sequence. Can you please clarify this here?

Thank you for pointing this out. Unlike Recurrent Neural Networks designed for processing time series data, the RF model is not able to capture temporal patterns automatically. In our study, while the RF daily inputs are treated independently by the model, the resulting daily predictions



are interpreted sequentially to determine transition points such as snowmelt onset or snowoff. This sequencing allows us to extract accurate phenology metrics from the model outputs.

We will update the paragraph accordingly, updates in bold:

We implemented a RF classifier to predict snow phenology, specifically focusing on estimating the annual timing (day of year) of snowmelt onset and snowoff across the YRB. The RF approach was chosen due to its ability to handle complex, high-dimensional data, and robustness to overfitting, making it well-suited for cryosphere applications (Breiman 2001, Alifu et al., 2020; Blandini et al., 2023). Although RF does not inherently model temporal sequences like some other algorithms, **our approach uses daily inputs to generate a sequence of predictions that are later interpreted in chronological order.** Each day is treated as an independent sample during training and prediction, but **the outputs are interpreted sequentially to identify the timing of snowpack transitions**, such as the first wet snow day indicating snowmelt onset. **This post-prediction sequencing is critical for deriving the correct day-of-year phenology metrics.** Accordingly, we used the RF implementation in scikit-learn (Pedregosa et al., 2011).

L230 – What were the spatial and temporal resolution of the other similar snow record? Is it really correct to say that this study is a “significant temporal enhancement”?

The previous snow record was at 6.25 km and the spatial resolution of the record presented in this paper is 3.125 km. As for the temporal resolution the threshold based snow records were originally 1988-2016 and those are the years analyzed in Pan et al. 2021. Those data were extended to 2018 and we used the extended version in this paper (1988-2018). With that said, the dataset presented in this paper is 7 years longer than the one previously published. It might not be wrong to say a ‘significant temporal enhancement’ when the new record is 25% longer than the previous. We will change ‘significant’ to ‘valuable.’

L239 – “By labeling the timeseries accordingly...” It is not clear to me how labeling the timeseries this way enables any of the following numbered points.

To be clearer, we will also update the following text, updates in bold:

To enhance the prediction of snow phenology, we configured the RF model to delineate daily snow conditions. We did this by classifying expected snow conditions for each day in a time series leading up to the observed snowmelt onset or snowoff day in spring as either ‘dry snow’ or ‘present’. After the observed onset or snowoff day, the conditions are labeled as ‘wet snow’ or ‘absent’, respectively. **This labeling approach transforms each time series into a sequence of daily snow condition classes, enabling a clear and daily description of a given evolving phenological event.** By labeling the time series accordingly, we were able to

Figure 2 – In the bottom panel, it would be more clear to set the y-axis as merely “dry” for 0, and “wet” for 1.

In line. We will make those changes accordingly.

L302/306 – Are these the scores of the training dataset? Testing?

Thank you for your comment. We have clarified in the text that the reported performance metrics were computed using the testing datasets from the bootstrapped model runs. We will make the clarification in the text.

L315 – Is there any bias in the snowmelt/snowoff timing?

Thank you for this comment. We will add bias to denote if there is any bias and in what direction it occurs for the two datasets.

L320 – What is “the full YRB dataset”?

We will clarify as follows, changes are in bold:

‘The final error assigned to the snow phenology dataset is assessed by comparing the RF model outputs **across the full YRB gridded dataset (i.e., model predictions for all pixels across the basin)** with **an independent validation dataset derived from** the limited number of GHCNd stations **located** within the YRB. From these stations, we calculated a MAE of 11.6 days and RMSE of 14.9 days for snowmelt onset. The model's snowoff results showed a MAE of 18.1 days and RMSE of 21.3 days relative to the station observations. **The higher final observed errors, compared to the bootstrapped model errors, are likely attributed to the greater heterogeneity in land cover and terrain across the basin, which is not fully represented by the sparse in-situ station network.**’

L322–323 – It is not clear to me how these MAE values differ from the ones presented in L315–317.

The first set of MAE are from the bootstrapped approach while the second using the testing observations to calculate MAE on the final model outputs.

We will clarify the paragraph accordingly:

Additionally, the model produced a Mean Absolute Error (MAE) of 5.86 days for snowmelt onset and 5.18 days for snowoff, indicating the average deviation between the predicted and observed dates **within the bootstrapped cross-validation framework**. The Root Mean Square Error (RMSE) values of the model results were 8.07 days for snowmelt onset and 6.89 days for snowoff. **These metrics reflect model performance during internal testing using bootstrapped subsets of the training data.**

**To evaluate final model accuracy on independent observations,** we compared RF model outputs across the full YRB dataset with snow phenology dates derived from the limited

number of GHCNd stations within the YRB. From these stations, we calculated a MAE of 11.6 days and RMSE of 14.9 days for snowmelt onset. The model's snowoff results showed a MAE of 18.1 days and RMSE of 21.3 days relative to the station observations. The higher observed errors compared to the bootstrapped results are likely attributed to the greater variability in land cover and snow conditions across the YRB, which is not fully represented by the sparse in-situ ground stations.

Section 5.1.2 – What are you using as the ground truth in this section to compute the MAE?

Thank you for this comment. We will clarify that the MAE values in this section are derived from bootstrapped model predictions, and that the observed snowmelt onset and snowoff dates used within the bootstrapping framework serve as the ground truth for computing error by land cover type.

We will adjust 5.1.2 as follows, updates in bold:

### 5.1.2 Landcover and Uncertainty

Mean absolute errors were binned by land cover to assess whether land cover characteristics had a significant influence on model performance. **These MAE values were derived from the bootstrapped model predictions, aggregated across all iterations and grouped by land cover type. MAE was calculated as the difference between predicted and observed snowmelt onset and snowoff dates, where the observed dates serve as the ground truth within the bootstrapping framework.** Land cover features such as elevation, TC, aspect, proximity, and FW were grouped into four natural breaks and compared with the corresponding model MAE to identify potential patterns or relationships. Figures 3 and 4 indicate that when elevation, proximity and FW decrease, MAE also decreases for both snowmelt onset and snowoff predictions. Conversely, as TC increases, MAE also increases, though this is only observable for snowmelt onset predictions. Also notable is that higher FW is associated with much higher MAE values for snowmelt onset. Hence, FW may be a major factor behind the overall lower model performance, relative to snowoff. Yet, overall, these landcover and error interactions are as anticipated – error increases with higher surface water cover, coastal proximity, and tree cover.

L335 – The ‘FW’ feature was not grouped into 4 natural breaks (not a variable in Fig. 3).

We will clarify why we did not aggregate FW.

FW was not aggregated by natural breaks because there were too few unique values.

L339 – “Higher FW is associated with much higher MAE values for snowmelt onset.”  
I don’t see this in Figure 4. FW of 10 and 13% have by far the highest MAE and then it decreases for higher values. Maybe I’m misunderstanding this figure?

Thank you for pointing this out. You are correct that Figure 4, as currently presented, does not clearly reflect the intended interpretation. Specifically, FW values of 10% and 13% are relatively high, and the figure is likely skewed by the small number of observations at those levels. In the revision, we will improve Figure 4 by normalizing FW by the number of observations within each FW bin, which will better represent the relationship between FW and model error.

Figure 3 – I think the division into ‘four natural breaks’ is not super helpful in this figure. I guess we can see that MAE for snowmelt is higher at higher elevation, but what are the elevations?

Also, it doesn’t make sense for the aspect feature as aspect describes a direction that has a cyclical nature, not really a standard increasing variable.

In line. We will rework this figure to include MAE and the actual land cover value, rather than binning. The intent was to show a more ‘relative’ perspective. The revised figure may look like a scatter plot, to be determined. We will also drop aspect.

Figure 4 – The x-axis for this plot is confusing to me. What is it binned so seemingly randomly? For example, the x-axis jumps from 10 to 11 to 13 to 22.

We addressed this in the earlier comment. But the randomness is because it is not classed on natural breaks and shows the actual unique values. To mitigate confusion we may remove this figure or modify in the revision.

L341 – Why is it anticipated that error increases with higher surface water cover?

Thank you for this question. Higher FW cover introduces greater uncertainty in the coarse-resolution passive microwave satellite observations due to the large contrast in emissivity between water bodies and the surrounding land features (e.g., snow, soil, and vegetation). Open water has a low emissivity and can mask or distort the snow signal by dampening the contrast between snow-covered and snow-free land.

We will add the following:

Higher error in areas with greater surface water cover (FW) is expected, as open water has low microwave emissivity and can obscure or distort the passive microwave signal used to detect snow state transitions.

L352 – “These results support inclusion of the static variables as additional RF predictors, despite their relatively low importance.” I’m not totally convinced by this. All the ANOVA results are saying is that the MAE is statistically significantly different for different land cover types, not that the land cover type is helping improve the model MAE, right? This analysis could indicate that perhaps your model is missing processes for certain land cover types, thus influencing the MAE for these land cover types, but I don’t think it indicates that the static variables are helping

improve the model. Did you test models with these static variables omitted to see how the MAE changes? This would give a better indication that the static variables are useful.

Thank you for this comment. We agree that the ANOVA results indicate differences in model error across land cover types but do not, by themselves, justify inclusion of the static variables in the model. We will revise the text to clarify this distinction and acknowledge that additional testing—such as running the model with and without static variables—would be needed to assess their actual contribution to improving performance.

We will update the text accordingly, updates in bold:

The one-way ANOVA results indicate that each land cover characteristic has a significant ( $p < 0.0001$ ) influence on MAE. For both snowmelt onset and snowoff, FW had the greatest impact with an F-statistic = 40.63. TC and proximity also showed substantial effects on MAE, with F-statistics of 21.34 and 30.18 for TC, and 10.25 and 19.22 for proximity, for snowmelt onset and snowoff, respectively. **These results indicate that model performance varies significantly by land cover type, suggesting that certain land cover characteristics are associated with higher or lower prediction errors. However, ANOVA alone does not demonstrate whether these static variables improve model performance when included as predictors. Future work could evaluate this more directly by comparing model performance with and without these static variables to determine their contribution to reducing prediction error.**

Section 5.4.2 – Are these anomalies better captured by the RF or are they already seen in other records?

The anomalous years described in Section 5.4.2 are apparent in the observational snow phenology records derived from satellite and in-situ data, and are not uniquely identified by the RF. However, the RF model does successfully capture the timing and magnitude of these anomalies in its predictions, demonstrating its ability to reproduce interannual variability and respond to extreme climate conditions.

We can add something as follows to the section: ‘These anomalies likely reflect broader climatic drivers, such as temperature fluctuations and abnormal precipitation, affecting snowmelt dynamics in these years. While these deviations are visible in the observational record, the RF model successfully reproduced the timing and magnitude of the anomalies, indicating its sensitivity to interannual climate variability.’

L421 – “Snowmelt onset occurred ~9 days earlier than average, and snowoff 6 days earlier, lengthening snowmelt duration by 4 days...”

Maybe this is a rounding error, but should this not be 3 days? Same with the following sentence. Maybe including decimals would help.

Thank you for this catch. We will change ‘4’ to ‘3.’

Section 5.5.2 – Can a figure be included for the trends in seasonal temperature? Also, what does the ‘tau’ value represent?

Yes we will include a figure for trends in seasonal temperature. Tau is a non-parametric rank correlation produced in the Mann-Kendall Test and provides an indicator of the direction and strength of two variables, here it's time and temperatures.

A figure comparing the performance of the different methods (IMS, SnowModel, thresholding, RF) for snowmelt and snowoff would be helpful.

Thank you for this comment we will consider a figure or table to make it easier to assess differences in model performance.

#### References:

Brodzik, M. J. and Long, D. G.: MEaSUREs Calibrated Enhanced-Resolution Passive Microwave Daily EASE-Grid 2.0 Brightness Temperature ESDR, Version 1, <https://doi.org/10.5067/MEASURES/CRYOSPHERE/NSIDC-0630.001>, 2016.

Kim, Y., Kimball, J. S., McDonald, K. C., and Glassy, J.: Developing a Global Data Record of Daily Landscape Freeze/Thaw Status Using Satellite Passive Microwave Remote Sensing, *IEEE Trans. Geosci. Remote Sensing*, 49, 949–960, <https://doi.org/10.1109/TGRS.2010.2070515>, 2011.

Liston, G. E., Itkin, P., Stroeve, J., Tschudi, M., Stewart, J. S., Pedersen, S. H., Reinking, A. K., and Elder, K.: A Lagrangian Snow-Evolution System for Sea-Ice Applications (SnowModel-LG): Part I—Model Description, *JGR Oceans*, 125, e2019JC015913, <https://doi.org/10.1029/2019JC015913>, 2020.

Pan, C. G., Kirchner, P. B., Kimball, J. S., Du, J., and Rawlins, M. A.: Snow Phenology and Hydrologic Timing in the Yukon River Basin, AK, USA, *Remote Sensing*, 13, 2284, <https://doi.org/10.3390/rs13122284>, 2021.

Wang, L., Toose, P., Brown, R., and Derksen, C.: Frequency and distribution of winter melt events from passive microwavesatellite data in the pan-Arctic, 1988–2013, *The Cryosphere*, 10, 2589–2602, <https://doi.org/10.5194/tc-10-2589-2016>, 2016
